# Supplementary material
Source: PubMed Central journal article supplement (PMC4568063)

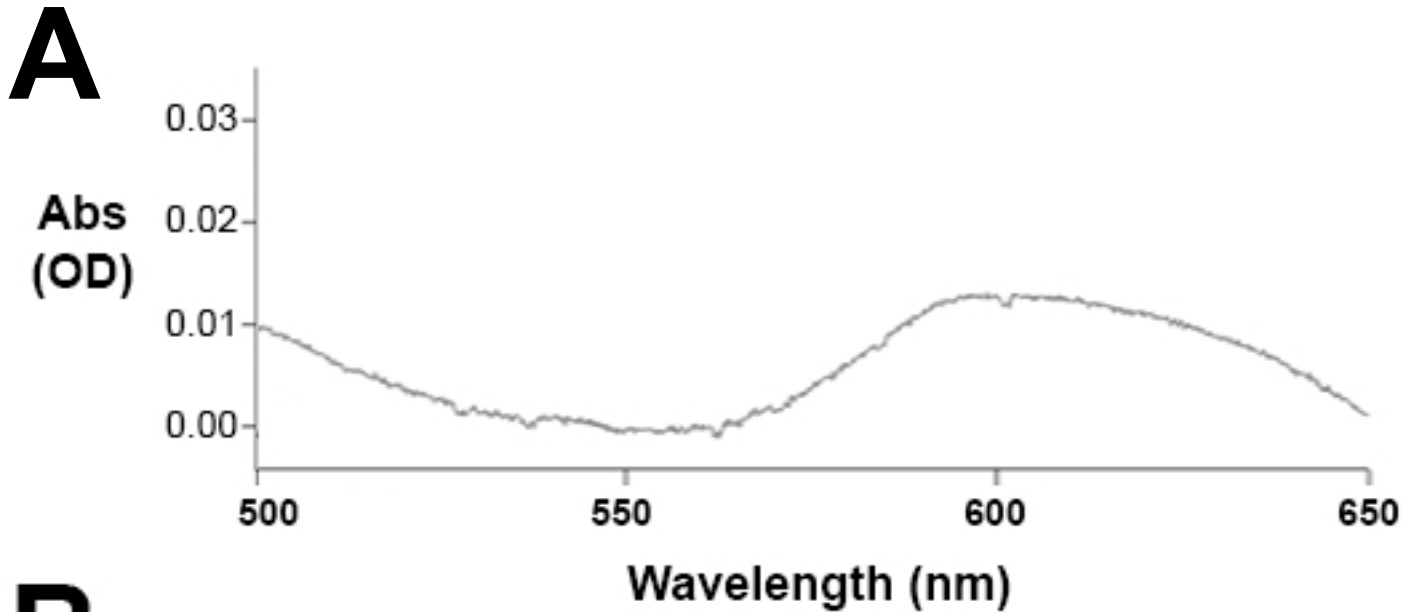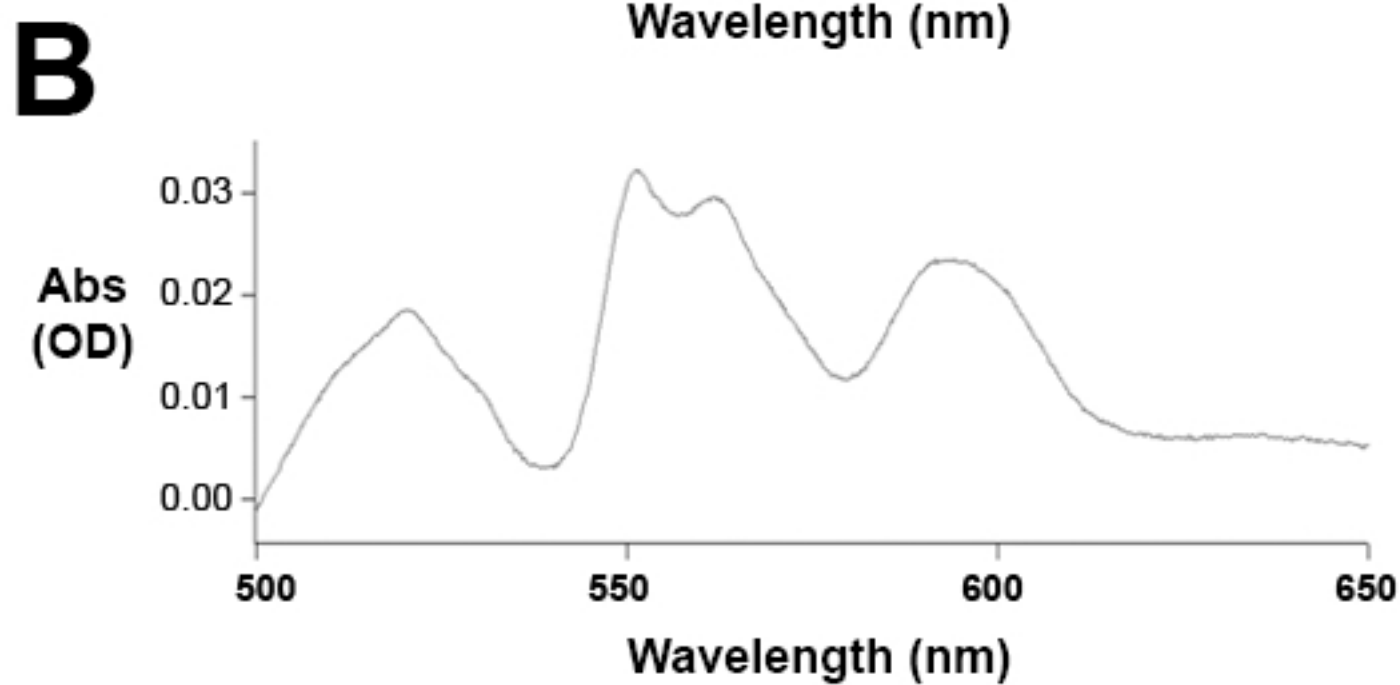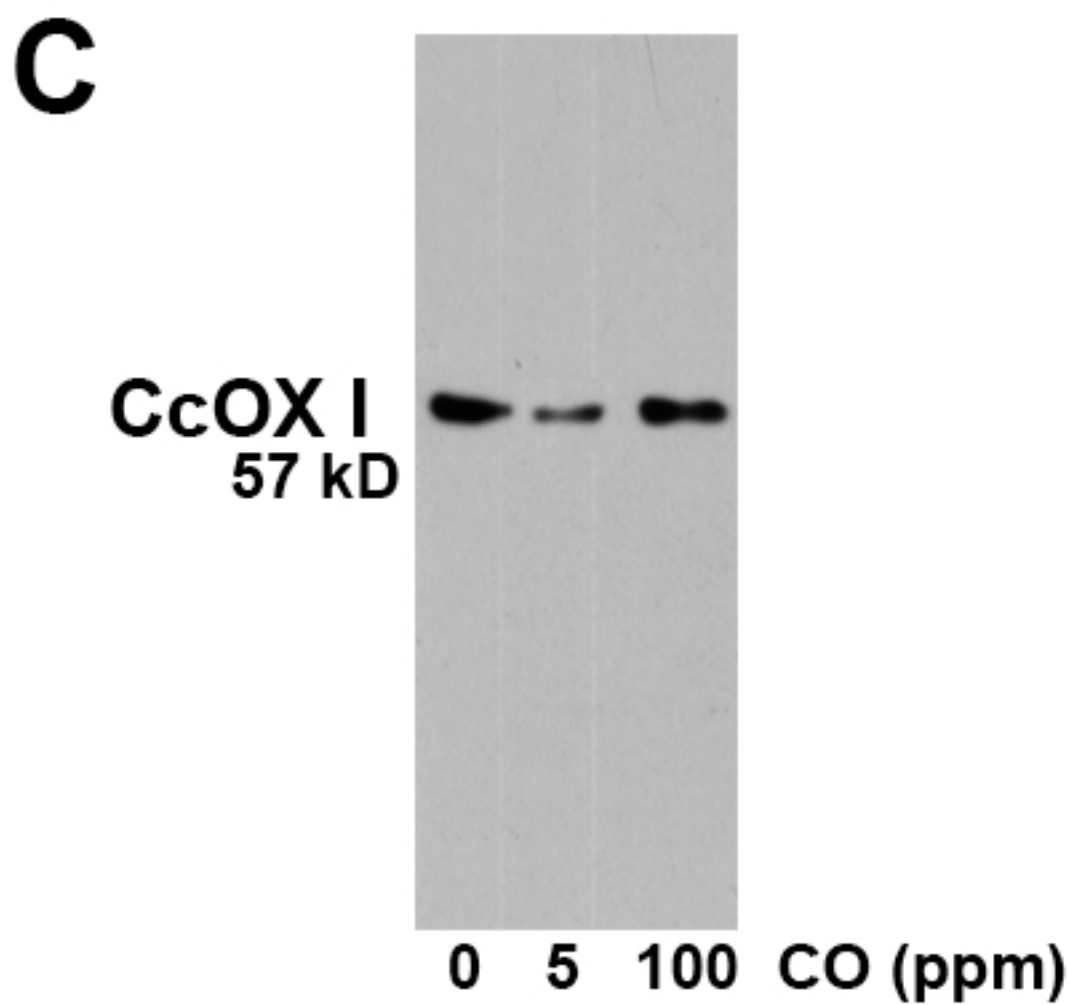

Supplement: NIHMS695766-supplement.pdf [file NIHMS695766-supplement.pdf]
